# Supplementary material for: Sex differences in borderline personality disorder: A scoping review
Source: PLoS One. 2022 Dec 30;17(12):e0279015. doi: 10.1371/journal.pone.0279015 (PMC9803119; doi:10.1371/journal.pone.0279015)
Supplement: S1 Table — (XLSX) [file pone.0279015.s003.xlsx]

## Sheet: Full
Category	Cov no.	Title	Authors	Year	Country	BPD/F sample	Total sample	% with BPD	If % is calculated, what is the population?	Comparison group	Study Type	Notes:	Ethnicity							Socio-economic																		Prevalence	Symptom Manifestation
																				Education						Marriage						Employment
									1. General Population 2. Psychiatric 3. SUD 4. Inmates 5. NA 6. Others		1. RCT 2. Cohort Study 3. Case-control Study 4. One-group Quasi Experimental 5. Qualitative		White/ Non-Hispanic Caucasian	African American	Native American	Hispanic	Asian	Other	Did not indicate	Did not graduate high school	High School	Attended some college	4-year college degree	Graduate degree	Years of education	Married	Single	With partner	Never Married	Divorced	Other	Employed	Disability pension	Average annual Income	<15,000	15,000-30,000	>30,000-50,000		Avoidance of Abandoment / Abandonment fears	Unstable or Intense Marriage / Romantic relationships (Idealization/ Splitting)	Identity Disturbance (relations to others, capacity to experience self and others as mutually autonomous, self-object differentiation)	Impulsivity / Risky Behaviour / Sensation Seeking	Suicidal Behaviour / Self-Harm	Affective Instability / Emotional regulation	Chronic Emptiness	Uncontrolled anger / Aggressive Behaviour / Hostility	Stress-related Paranoid ideation / Dissociation Symptoms	BPD criteria	Functioning / Adjustment
[truncated: 107 more columns]
